# Supplementary material for: Patterns of follow up and survivorship care for people with colorectal cancer in new South Wales, Australia: a population-based survey
Source: Springer Nature journal article supplement (doi:10.1186/s12885-018-4297-6), 2018-03-27
Supplement: MOESM1 [file 15571296]

## NSW Bowel Cancer Care Follow-up Survey

This is the follow-up questionnaire to the **NSW Bowel Cancer Care Survey** you completed 6 months ago. This questionnaire asks about your follow-up care and arrangements, and gives you an opportunity to share your bowel cancer experience to help improve future care for patients with bowel cancer.

**Any questions or concerns?** Please call us on 1800 210 841 or email: [connect@sswahs.nsw.gov.au](mailto:connect@sswahs.nsw.gov.au)

Thank you for your ongoing participation in this study.

**1. What is today's date?**

|  |  |   |  |  |   |   |   |  |  |
|--|--|---|--|--|---|---|---|--|--|
|  |  | / |  |  | / | 2 | 0 |  |  |
|--|--|---|--|--|---|---|---|--|--|

### Your Health and Recovery

**2. In general, would you say your health is:**

- Excellent
- Very good
- Good
- Fair
- Poor

**3. At any time since you were diagnosed with cancer, did a doctor or other health professional tell you that your cancer had come back (that is, you had a recurrence)?**

- Not sure
- No
- Yes **Where is it located?**
  - Bowel
  - Lungs
  - Liver
  - Other (please specify): \_\_\_\_\_

Sometimes, a patient will be given a **written follow-up plan** that outlines the follow-up arrangements and tests that are planned for the future.

**4. Have you been given a written follow-up plan?**

- Yes
- No
- Not sure
- I have been told that I will receive a written follow-up plan after I complete my treatment

## Your Follow-up Care

**5. Since completing treatment for your bowel cancer, have you seen any of the following health professionals for routine follow-up?**

*Please tick all that apply*

- GP
- Surgeon
- Gastroenterologist
- Medical oncologist
- Radiation oncologist
- Other specialist (*please specify*): \_\_\_\_\_

**6. Have you had any of the below tests since completing your treatment?**

*Please tick all that apply*

- Barium Enema
- Colonoscopy
- Sigmoidoscopy
- CT scan of abdomen
- CT scan of chest
- Chest X-Ray
- Faecal Occult Blood Test (FOBT)
- Routine blood test (blood count, blood tests for liver and kidney function)
- CEA test (specific blood test for bowel cancer)

Thinking about the future, the following questions ask about the arrangements for your follow-up care over the next 3 years. If you are unsure, please answer to the best of your ability.

**7. Have you been advised to see any Doctor for routine follow-up of your bowel cancer over the next three years? If yes, please indicate how frequently you have been advised to see them.**

*Please tick all that apply*

|                                           |                                         | Annually                 | Every 2 years            | Every 3 years            | Other ( <i>please specify</i> ): |
|-------------------------------------------|-----------------------------------------|--------------------------|--------------------------|--------------------------|----------------------------------|
| GP                                        | <input checked="" type="checkbox"/> Yes | <input type="checkbox"/> | <input type="checkbox"/> | <input type="checkbox"/> |                                  |
|                                           | <input type="checkbox"/> No             |                          |                          |                          |                                  |
|                                           | <input type="checkbox"/> Not sure       |                          |                          |                          | _____                            |
| Surgeon                                   | <input checked="" type="checkbox"/> Yes | <input type="checkbox"/> | <input type="checkbox"/> | <input type="checkbox"/> |                                  |
|                                           | <input type="checkbox"/> No             |                          |                          |                          |                                  |
|                                           | <input type="checkbox"/> Not sure       |                          |                          |                          | _____                            |
| Gastroenterologist                        | <input checked="" type="checkbox"/> Yes | <input type="checkbox"/> | <input type="checkbox"/> | <input type="checkbox"/> |                                  |
|                                           | <input type="checkbox"/> No             |                          |                          |                          |                                  |
|                                           | <input type="checkbox"/> Not sure       |                          |                          |                          | _____                            |
| Radiation oncologist                      | <input checked="" type="checkbox"/> Yes | <input type="checkbox"/> | <input type="checkbox"/> | <input type="checkbox"/> |                                  |
|                                           | <input type="checkbox"/> No             |                          |                          |                          |                                  |
|                                           | <input type="checkbox"/> Not sure       |                          |                          |                          | _____                            |
| Medical oncologist                        | <input checked="" type="checkbox"/> Yes | <input type="checkbox"/> | <input type="checkbox"/> | <input type="checkbox"/> |                                  |
|                                           | <input type="checkbox"/> No             |                          |                          |                          |                                  |
|                                           | <input type="checkbox"/> Not sure       |                          |                          |                          | _____                            |
| Other ( <i>please specify</i> ):<br>_____ | <input checked="" type="checkbox"/> Yes | <input type="checkbox"/> | <input type="checkbox"/> | <input type="checkbox"/> |                                  |
|                                           | <input type="checkbox"/> No             |                          |                          |                          |                                  |
|                                           | <input type="checkbox"/> Not sure       |                          |                          |                          | _____                            |

**8. Have you been advised to have any of the following tests or investigations in the next three years?**  
*Please tick all that apply*

|                                                                             |                                                                                                                             | Annually                 | Every 2 years            | Every 3 years            | Other ( <i>please specify</i> ): |
|-----------------------------------------------------------------------------|-----------------------------------------------------------------------------------------------------------------------------|--------------------------|--------------------------|--------------------------|----------------------------------|
| Colonoscopy                                                                 | <input checked="" type="checkbox"/> Yes    | <input type="checkbox"/> | <input type="checkbox"/> | <input type="checkbox"/> | _____                            |
|                                                                             | <input type="checkbox"/> No                                                                                                 |                          |                          |                          |                                  |
|                                                                             | <input type="checkbox"/> Not sure                                                                                           |                          |                          |                          |                                  |
| Sigmoidoscopy                                                               | <input checked="" type="checkbox"/> Yes    | <input type="checkbox"/> | <input type="checkbox"/> | <input type="checkbox"/> | _____                            |
|                                                                             | <input type="checkbox"/> No                                                                                                 |                          |                          |                          |                                  |
|                                                                             | <input type="checkbox"/> Not sure                                                                                           |                          |                          |                          |                                  |
| CT scan of abdomen                                                          | <input checked="" type="checkbox"/> Yes    | <input type="checkbox"/> | <input type="checkbox"/> | <input type="checkbox"/> | _____                            |
|                                                                             | <input type="checkbox"/> No                                                                                                 |                          |                          |                          |                                  |
|                                                                             | <input type="checkbox"/> Not sure                                                                                           |                          |                          |                          |                                  |
| CT scan of chest                                                            | <input checked="" type="checkbox"/> Yes    | <input type="checkbox"/> | <input type="checkbox"/> | <input type="checkbox"/> | _____                            |
|                                                                             | <input type="checkbox"/> No                                                                                                 |                          |                          |                          |                                  |
|                                                                             | <input type="checkbox"/> Not sure                                                                                           |                          |                          |                          |                                  |
| Chest X-Ray                                                                 | <input checked="" type="checkbox"/> Yes    | <input type="checkbox"/> | <input type="checkbox"/> | <input type="checkbox"/> | _____                            |
|                                                                             | <input type="checkbox"/> No                                                                                                 |                          |                          |                          |                                  |
|                                                                             | <input type="checkbox"/> Not sure                                                                                           |                          |                          |                          |                                  |
| Faecal Occult Blood Test (FOBT)                                             | <input checked="" type="checkbox"/> Yes  | <input type="checkbox"/> | <input type="checkbox"/> | <input type="checkbox"/> | _____                            |
|                                                                             | <input type="checkbox"/> No                                                                                                 |                          |                          |                          |                                  |
|                                                                             | <input type="checkbox"/> Not sure                                                                                           |                          |                          |                          |                                  |
| Routine blood test (blood count, blood tests for liver and kidney function) | <input checked="" type="checkbox"/> Yes  | <input type="checkbox"/> | <input type="checkbox"/> | <input type="checkbox"/> | _____                            |
|                                                                             | <input type="checkbox"/> No                                                                                                 |                          |                          |                          |                                  |
|                                                                             | <input type="checkbox"/> Not sure                                                                                           |                          |                          |                          |                                  |
| CEA test (specific blood test for bowel cancer)                             | <input checked="" type="checkbox"/> Yes  | <input type="checkbox"/> | <input type="checkbox"/> | <input type="checkbox"/> | _____                            |
|                                                                             | <input type="checkbox"/> No                                                                                                 |                          |                          |                          |                                  |
|                                                                             | <input type="checkbox"/> Not sure                                                                                           |                          |                          |                          |                                  |

**9. Which of the following statements best describes your preference for your follow-up care?**  
*Please tick the box that most applies*

- I would have preferred more follow-up consultations with my Doctors
- I would have preferred more follow-up investigations and tests
- I am happy with the follow-up consultations and investigations I received
- I would have preferred fewer follow-up investigations and tests
- I would have preferred fewer follow-up consultations with my Doctors

**10. How would you rate the care you received from your follow-up care Doctor?**

1    2    3    4    5    6    7    8    9    10  
*Very poor* *Excellent*

11. Since your diagnosis with cancer, have you been advised to have regular screening tests for other cancers?

Please tick all that apply

- No
- Yes →
  - Bowel cancer
  - Skin cancer
  - Breast cancer
  - Cervical cancer
  - Prostate cancer
  - Other (please specify): \_\_\_\_\_

12. Since your diagnosis with cancer, has your doctor discussed the risk of cancer for other members of your family?

Please note most cancers are NOT genetic and only a small number of families have a greater risk of cancer because they carry a changed gene

- No
- Yes

13. Since completing your cancer treatment, do you know what symptoms or changes in your health you should look out for that could be due to bowel cancer?

- No
- Yes

14. Since completing your cancer treatment, how much focus have you put in with other aspects of your lifestyle?

Please tick any that apply

|                                        | Less Effort              | Same                     | More Effort              | Not Applicable           |
|----------------------------------------|--------------------------|--------------------------|--------------------------|--------------------------|
| Healthy diet                           | <input type="checkbox"/> | <input type="checkbox"/> | <input type="checkbox"/> | <input type="checkbox"/> |
| Maintaining a healthy weight           | <input type="checkbox"/> | <input type="checkbox"/> | <input type="checkbox"/> | <input type="checkbox"/> |
| Being physically active                | <input type="checkbox"/> | <input type="checkbox"/> | <input type="checkbox"/> | <input type="checkbox"/> |
| Limiting alcohol consumption           | <input type="checkbox"/> | <input type="checkbox"/> | <input type="checkbox"/> | <input type="checkbox"/> |
| Stop smoking                           | <input type="checkbox"/> | <input type="checkbox"/> | <input type="checkbox"/> | <input type="checkbox"/> |
| Sun protection                         | <input type="checkbox"/> | <input type="checkbox"/> | <input type="checkbox"/> | <input type="checkbox"/> |
| Managing stress or anxiety             | <input type="checkbox"/> | <input type="checkbox"/> | <input type="checkbox"/> | <input type="checkbox"/> |
| Getting enough sleep                   | <input type="checkbox"/> | <input type="checkbox"/> | <input type="checkbox"/> | <input type="checkbox"/> |
| Pap tests and mammography (women only) | <input type="checkbox"/> | <input type="checkbox"/> | <input type="checkbox"/> | <input type="checkbox"/> |

15. Since completing your cancer treatment, have you received assistance from a health professional (eg. doctor, nurse, dietician, counsellor) with any of the above?

- No
- Yes

If yes, please describe:

**16. Since completing your cancer treatment, would you like to have received more assistance, advice or support about general health or lifestyle issues?**

No

Yes

*If yes, which aspects of your lifestyle would you have liked more help with?*

---

**17. Since your diagnosis with cancer, have you or your family members used any services or resources that support coping or emotional well-being?**

*Please tick all that apply*

No, I did not need this type of support

No, I did not know about these services

Yes

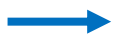

Saw a psychologist/counsellor

Attended a cancer support group

Used internet and computer resources (eg. websites, online communities, blogs & online support groups)

Used a telephone support helpline (eg. Cancer Council helpline)

Other(*please specify*): \_\_\_\_\_

**18. Did you have any comments or experiences that you would like to share?**

---

---

---

***Thank you very much for your time***
